# Supplementary material for: Comparing the reliability of the single leg squat test using two, three, and four category ordinal rating scales
Source: PeerJ. 2025 Oct 15;13:e20218. doi: 10.7717/peerj.20218 (PMC12535228; doi:10.7717/peerj.20218)
Supplement: Supplemental Information 2 — SLST visual assessment outcome rated by two raters [file peerj-13-20218-s002.xlsx]

## Sheet: Demographic1
Subject	age	gender(1/0) (1)male (2)female	height(cm)	weight(Kg)	LEFS	UCLA	Surgery(1/0) (1)yes (2)no	Diagnosis
1	23	1	170	63	67	5	0	Pattelofermoral Pain
2	29	1	175	65.09	70	3	0	LAS
3	23	1	178	82.6	67	9	0	ITB sydrome
4	25	1	175	68.5	69	10	0	FAI
5	23	2	161	51.2	68	5	0	Meniscus Injury
6	25	1	180	57.3	69	5	0	Chndromalacia patellao
7	22	1	175.26	60.78	65	10	0	ACL injury
8	22	1	167	84.82	67	10	1	Jones fracture
9	21	2	172	60.71	61	10	1	ACL reconstruction
10	23	1	170	67.13	68	6	0	Pattelofermoral Pain
11	21	1	177.8	91.17	68	10	0	ACL injury
12	25	1	173	70.3	62	9	0	Pattela Tendonitis
13	21	2	162	64.9	65	6	0	ACL injury
14	22	2	167.6	64.6	64	9	0	ACL injury
15	19	2	165	75.7	68	10	1	Achilles Tedon reputure
16	18	2	175.3	80.3	66	10	1	ACL reconstruction/ LAS
17	21	2	188	63	70	10	1	ACL injury
18	20	2	175	73.5	52	10	1	Achilles Tedon reputure
19	33	2	170.2	60.33	70	9	0	Hip pain
20	21	2	158	48.17	66	9	0	Pattelofermoral Pain
21	27	1	170	68.95	67	6	0	Ptalar facities
22	22	2	173	78.02	66	5	0	ACL MCL injury
23	22	2	162	73.94	70	5	0	ITB sydrome
24	22	2	162	57.6	70	4	0	Pattela Tendonitis
25	22	2	159	57.15	68	3	0	Pattelofermoral Pain
26	26	2	166.7	63.96	64	9	0	CAI
27	29	2	167.6	64.86	64	10	0	Qud Tendon pathy
28	22	2	164	56.69	65	8	0	LAS
29	22	2	163	67.58	66	5	0	CAI

## Sheet: Demographic 2
Subject	age	gender(1/0) (1)male (2)female	height(cm)	weight(Kg)	LEFS	UCLA	Surgery(1/0) (1)yes (2)no	Diagnosis
1	32	163	54	2	70	1	10	Intra-articular hip
2	24	160	120	2	67	2	10	Foot and ankle
3	27	180	114	1	50	1	2	Intra-articular knee
4	23	185	76	1	70	2	10	Foot and ankle
5	24	185	78.9	1	61	2	9	Extra-articular hip
6	23	178	90	1	66	1	9	Foot and ankle
7	23	178	63	1	68	2	9	Foot and ankle
8	25	167	64	2	63	2	4	Intra-articular knee
9	22	164	47.6	2	68	2	6	Extra-articular hip
10	24	159	54.4	2	66	1	8	Extra-articular knee
11	23	170	51	2	64	2	6	Extra-articular knee
12	23	168	55	2	68	2	9	Intra-articular knee
13	19	160	57.5	2	69	2	9	Foot and ankle
14	19	175	69.75	1	68	2	9	Foot and ankle
15	28	167	62.5	2	64	1	9	Foot and ankle
16	24	163	56.7	2	64	2	3	Foot and ankle
17	23	172	61	2	70	1	9	Extra-articular knee
18	33	162	58	2	56	1	4	Foot and ankle
19	39	167.6	66.6	2	67	2	7	Extra-articular knee
20	22	163	65	2	65	2	9	Foot and ankle
21	25	182	90	1	70	1	9	Foot and ankle
22	24	186	80	1	66	2	8	Extra-articular knee
23	22	180	75	1	62	1	8	Extra-articular knee
24	23	178	90	1	70	2	6	Foot and ankle
25	23	175	77	1	63	2	9	Intra-articular knee
26	29	158	53	2	66	1	5	Extra-articular knee
27	23	183	102	1	66	1	9	Extra-articular knee
28	23	173	63	1	70	2	5	Foot and ankle
29	44	167	58	2	64	2	3	Foot and ankle

## Sheet: Inter+4C
	Rater 1 Neo								Rater 2 RM
Subject	Trunk Flexion	Trunk Lateral	Trunk Rotaion	Trunk overall	Hip ADD	LE IR/AB	Muscle	Overall	Trunk Flexion	Trunk Lateral	Trunk Rotaion	Trunk overall	Hip ADD	LE IR/AB	Muscle	Overall
1	3	2	3	2	2	2	0	6	3	3	3	3	2	2	1	8
2	2	1	2	1	1	1	0	3	2	1	2	1	1	1	1	4
3	3	2	3	2	3	2	0	7	3	1	3	1	3	2	0	6
4	3	2	3	2	2	2	0	6	3	2	3	2	3	2	0	7
5	3	2	3	2	1	1	0	4	3	1	3	1	1	1	0	3
6	3	3	3	3	3	2	0	8	3	3	3	3	3	2	0	8
7	2	2	1	1	2	0	1	4	2	3	3	2	2	0	1	5
8	3	2	3	2	1	1	0	4	2	1	2	1	1	1	0	3
9	3	2	3	2	3	1	0	6	3	2	3	2	2	1	0	5
10	3	2	1	1	3	2	1	7	2	2	1	1	2	1	1	5
11	3	1	1	1	1	1	0	3	2	1	1	1	2	1	0	4
12	3	1	2	1	1	1	0	3	3	1	2	1	1	1	0	3
13	3	2	3	2	1	2	0	5	3	1	3	1	1	1	0	3
14	2	0	2	0	1	2	0	3	2	0	2	0	1	2	0	3
15	2	2	3	2	2	2	1	7	2	1	2	1	2	2	1	6
16	3	2	2	2	2	3	0	7	3	2	3	2	2	3	0	7
17	3	3	3	3	2	3	0	8	3	3	3	3	2	3	0	8
18	3	1	3	1	2	2	0	5	3	1	3	1	1	2	0	4
19	3	3	3	3	3	3	1	10	3	3	3	3	3	3	1	10
20	3	2	3	2	3	3	0	8	2	2	3	2	3	2	0	7
21	2	1	2	1	2	0	0	3	1	1	2	1	1	1	0	3
22	3	2	3	2	3	2	0	7	3	2	3	2	3	2	0	7
23	3	0	1	0	2	1	0	3	2	1	2	1	2	1	0	4
24	2	2	2	2	3	1	0	6	2	1	2	1	1	1	0	3
25	3	2	2	2	3	2	0	7	3	2	2	2	3	2	0	7
26	1	0	0	0	1	0	0	1	0	0	0	0	1	0	0	1
27	2	1	2	1	2	1	0	4	1	1	2	1	1	1	0	3
28	2	0	2	0	0	1	0	2	1	0	1	0	0	1	0	1
29	2	1	1	1	1	1	0	3	2	1	1	1	1	1	0	3

## Sheet: Inter-3C
	Rater 1 Neo								Rater 2 RM
Subject	Trunk Flexion	Trunk Lateral	Trunk Rotaion	Trunk overall	Hip ADD	LE IR/AB	Muscle	Overall	Trunk Flexion	Trunk Lateral	Trunk Rotaion	Trunk overall	Hip ADD	LE IR/AB	Muscle	Overall
1	2	1	2	1	1	1	0	3	2	2	2	2	1	1	1	5
2	1	1	1	1	1	1	0	3	1	1	1	1	1	1	0	3
3	2	1	2	1	2	1	0	4	2	1	2	1	2	1	0	4
4	2	1	2	1	1	1	0	3	2	1	2	1	2	1	0	4
5	2	1	2	1	1	1	0	3	2	1	2	1	1	1	0	3
6	2	2	2	2	2	1	0	5	2	2	2	2	2	1	0	5
7	1	1	1	1	1	0	1	3	1	2	2	1	1	0	1	3
8	2	1	2	1	1	1	0	3	1	1	1	1	1	1	0	3
9	2	1	2	1	2	1	0	4	2	1	2	1	1	1	0	3
10	2	1	1	1	2	1	1	5	1	1	1	1	1	1	1	4
11	1	1	1	1	1	1	0	3	1	1	1	1	1	1	0	3
12	2	1	1	1	1	1	0	3	2	1	1	1	1	1	0	3
13	2	1	2	1	1	1	0	3	2	1	2	1	1	1	0	3
14	1	0	1	0	1	1	0	2	1	0	1	0	1	1	0	2
15	1	1	2	1	1	1	1	4	1	1	1	1	1	1	1	4
16	2	1	1	1	1	2	0	4	2	1	2	1	1	2	0	4
17	2	2	2	2	1	2	0	5	2	2	2	2	1	2	0	5
18	2	1	2	1	1	1	0	3	2	1	2	1	1	1	0	3
19	2	2	2	2	2	2	1	7	2	2	2	2	2	2	1	7
20	2	1	2	1	2	2	0	5	1	1	2	1	2	1	0	4
21	1	1	1	1	1	0	0	2	1	1	1	1	1	1	0	3
22	2	1	2	1	2	1	0	4	2	1	2	1	2	1	0	4
23	2	0	1	0	1	1	0	2	1	1	1	1	1	1	0	3
24	1	1	1	1	2	1	0	4	1	1	1	1	1	1	0	3
25	2	1	1	1	2	1	0	4	2	1	1	1	2	1	0	4
26	1	0	0	0	1	0	0	1	0	0	0	0	1	0	0	1
27	1	1	1	1	1	1	0	3	1	1	1	1	1	1	0	3
28	1	0	1	0	0	1	0	1	1	0	1	0	0	1	0	1
29	1	1	1	1	1	1	0	3	1	1	1	1	1	1	0	3

## Sheet: Inter-2C
	Rater 1 Neo								Rater 2 RM
Subject	Trunk Flexion	Trunk Lateral	Trunk Rotaion	Trunk overall	Hip ADD	LE IR/AB	Muscle	Overall	Trunk Flexion	Trunk Lateral	Trunk Rotaion	Trunk overall	Hip ADD	LE IR/AB	Muscle	Overall
1	1	0	1	0	0	0	0	0	1	1	1	1	0	0	1	2
2	0	0	0	0	0	0	0	0	0	0	0	0	0	0	0	0
3	1	0	1	0	1	0	0	1	1	0	1	0	1	0	0	1
4	1	0	1	0	0	0	0	0	1	0	1	0	1	0	0	1
5	1	0	1	0	0	0	0	0	1	0	1	0	0	0	0	0
6	1	1	1	1	1	0	0	2	1	1	1	1	1	0	0	2
7	0	0	0	0	0	0	1	1	0	1	1	0	0	0	1	1
8	1	0	1	0	0	0	0	0	0	0	0	0	0	0	0	0
9	1	0	1	0	1	0	0	1	1	0	1	0	0	0	0	0
10	1	0	0	0	1	0	1	2	0	0	0	0	0	0	1	1
11	0	0	0	0	0	0	0	0	0	0	0	0	0	0	0	0
12	1	0	0	0	0	0	0	0	1	0	0	0	0	0	0	0
13	1	0	1	0	0	0	0	0	1	0	1	0	0	0	0	0
14	0	0	0	0	0	0	0	0	0	0	0	0	0	0	0	0
15	0	0	1	0	0	0	1	1	0	0	0	0	0	0	1	1
16	1	0	0	0	0	1	0	1	1	0	1	0	0	1	0	1
17	1	1	1	1	0	1	0	2	1	1	1	1	0	1	0	2
18	1	0	1	0	0	0	0	0	1	0	1	0	0	0	0	0
19	1	1	1	1	1	1	1	4	1	1	1	1	1	1	1	4
20	1	0	1	0	1	1	0	2	0	0	1	0	1	0	0	1
21	0	0	0	0	0	0	0	0	0	0	0	0	0	0	0	0
22	1	0	1	0	1	0	0	1	1	0	1	0	1	0	0	1
23	1	0	0	0	0	0	0	0	0	0	0	0	0	0	0	0
24	0	0	0	0	1	0	0	1	0	0	0	0	0	0	0	0
25	1	0	0	0	1	0	0	1	1	0	0	0	1	0	0	1
26	0	0	0	0	0	0	0	0	0	0	0	0	0	0	0	0
27	0	0	0	0	0	0	0	0	0	0	0	0	0	0	0	0
28	0	0	0	0	0	0	0	0	0	0	0	0	0	0	0	0
29	0	0	0	0	0	0	0	0	0	0	0	0	0	0	0	0

## Sheet: Intra-2C
Subject	Trunk Flexion	Trunk Lateral	Trunk Rotaion	Overall	Trunk Flexion	Trunk Lateral	Trunk Rotaion	Overall
	Baseline				Retest 1W
1	0	0	0	0	0	0	0	0
2	0	0	0	0	0	0	0	0
3	0	0	0	0	0	0	0	0
4	0	0	0	0	0	0	0	0
5	0	0	0	0	0	1	0	1
6	0	0	1	1	0	0	1	1
7	0	0	0	0	0	0	0	0
8	0	0	0	0	0	0	0	0
9	1	0	0	1	1	0	0	1
10	0	1	1	2	1	1	0	2
11	0	0	0	0	0	0	0	0
12	0	0	0	0	0	1	0	1
13	0	0	0	0	0	0	0	0
14	0	0	0	0	0	0	0	0
15	0	0	0	0	0	0	0	0
16	0	0	0	0	0	0	0	0
17	0	1	0	1	0	1	0	1
18	0	0	1	1	0	0	0	0
19	0	0	0	0	0	0	0	0
20	0	0	0	0	0	0	0	0
21	0	0	0	0	0	0	0	0
22	0	0	0	0	0	0	0	0
23	0	0	0	0	0	0	0	0
24	0	1	0	1	0	1	0	1
25	0	0	0	0	0	0	0	0
26	0	1	0	1	0	0	0	0
27	0	0	0	0	0	0	0	0
28	0	1	0	1	0	1	0	1
29	0	0	0	0	0	0	0	0

## Sheet: Intra-3C
Subject	Trunk Flexion	Trunk Lateral	Trunk Rotaion	Overall	Trunk Flexion	Trunk Lateral	Trunk Rotaion	Overall
	Baseline				Retest 1W
1	0	1	1	2	1	1	1	3
2	1	1	1	3	1	1	1	3
3	1	1	1	3	1	1	1	3
4	0	0	1	1	1	0	1	2
5	1	1	0	2	1	2	1	4
6	0	1	2	3	1	1	2	4
7	0	1	0	1	0	1	1	2
8	0	1	1	2	0	1	1	2
9	2	1	1	4	2	1	1	4
10	1	2	2	5	2	2	1	5
11	0	1	1	2	1	1	1	3
12	1	1	1	3	1	2	1	4
13	1	1	1	3	1	1	1	3
14	1	1	1	3	1	1	1	3
15	0	1	1	2	0	1	0	1
16	1	1	0	2	1	1	1	3
17	1	2	1	4	1	2	1	4
18	1	1	2	4	1	1	1	3
19	1	1	1	3	1	1	1	3
20	1	2	1	4	1	2	1	4
21	0	1	0	1	0	1	1	2
22	1	1	1	3	1	1	1	3
23	0	0	1	1	0	0	1	1
24	1	2	1	4	1	2	0	3
25	1	1	1	3	1	1	1	3
26	0	2	1	3	0	1	1	2
27	0	1	0	1	0	1	0	1
28	1	2	1	4	1	2	1	4
29	0	0	0	0	0	1	0	1

## Sheet: Intra-4C
Subject	Trunk Flexion	Trunk Lateral	Trunk Rotaion	Overall	Trunk Flexion	Trunk Lateral	Trunk Rotaion	Overall
	Baseline				Retest 1W
1	0	1	2	3	1	1	2	4
2	1	2	1	4	2	2	1	5
3	0	1	1	2	1	1	1	3
4	0	0	1	1	1	0	1	2
5	1	2	0	3	1	2	1	4
6	0	1	3	4	1	1	3	5
7	0	1	0	1	0	1	1	2
8	0	2	1	3	0	2	1	3
9	3	2	2	7	3	2	2	7
10	2	3	3	8	3	3	2	8
11	0	2	1	3	2	2	2	6
12	1	2	1	4	2	3	1	6
13	2	2	1	5	2	2	1	5
14	2	1	1	4	1	1	1	3
15	0	1	1	2	0	1	0	1
16	1	1	0	2	1	1	1	3
17	2	3	1	6	2	3	1	6
18	2	2	3	7	2	2	2	6
19	2	2	2	6	2	2	2	6
20	1	3	1	5	2	3	2	7
21	1	2	0	3	0	2	2	4
22	2	2	1	5	2	2	2	6
23	0	0	1	1	0	0	1	1
24	2	3	1	6	2	3	0	5
25	2	2	1	5	2	2	2	6
26	0	3	1	4	0	2	1	3
27	0	1	0	1	0	1	0	1
28	2	3	1	6	2	3	1	6
29	0	0	0	0	0	1	0	1
